# Supplementary material for: Rapid, multiplexed, whole genome and plasmid sequencing of foodborne pathogens using long-read nanopore technology
Source: PubMed Central journal article supplement (PMC6841976; doi:10.1038/s41598-019-52424-x), 2019-11-08
Supplement: 41598_2019_52424_MOESM1_ESM.pdf [file 41598_2019_52424_MOESM1_ESM.pdf]

## Supplementary Files

Rapid, multiplexed, whole genome and plasmid sequencing of foodborne pathogens using long-read nanopore technology

Tonya L. Taylor<sup>1</sup>, Jeremy D. Volkening<sup>2</sup>, Eric DeJesus<sup>3</sup>, Mustafa Simmons<sup>3</sup>, Kiril M. Dimitrov<sup>1</sup>, Glenn E. Tillman<sup>3</sup>, David L. Suarez<sup>1</sup> and Claudio L. Afonso<sup>1\*</sup>

1. Exotic and Emerging Avian Viral Diseases Research Unit, Southeast Poultry Research Laboratory, US National Poultry Research Center, Agricultural Research Service, USDA, 934 College Station Road, Athens, GA, USA.
2. BASE<sub>2</sub>BIO, Oshkosh, WI, USA.
3. Office of Public Health Services, Food Safety and Inspection Services, USDA, 950 College Station Road, Athens, GA, USA

\*Corresponding author: **Claudio L. Afonso**. Phone: +1 (706) 546 – 3642. Email:

Claudio.Afonso@ars.usda.gov. Mailing address: USDA ARS, Southeast Poultry Research Laboratory, 934 College Station Rd., Athens, GA 30605. Fax: (706) 546-3161.

**Supplemental Figure S1. MinION sequencing run time versus accuracy of polished (2x) assemblies.**

The raw MinION sequencing data for both isolates were subsampled based on cumulative run time in order to simulate the effect of run length on polished assembly quality. At the 240-minute time point, two circularized contigs, one chromosome and one plasmid, from both isolates were fully sequenced, and the accuracy, after two rounds of polishing, levels off and does not significantly increase with longer run times.

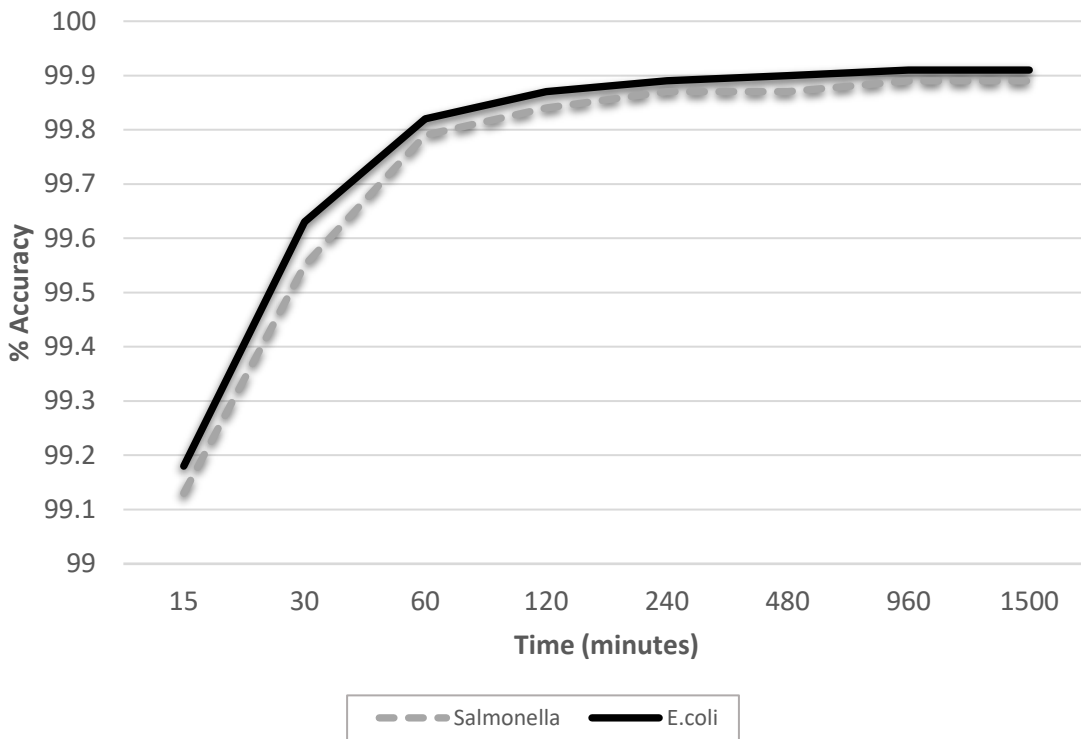

**Supplemental Table S1: Salmonella outbreak isolates used as reference data set for phylogenetic analysis (Timme et al., 2017).**

| Strain      | GenBank Assembly | SRA Accession | Outbreak year-Location | Location  |
|-------------|------------------|---------------|------------------------|-----------|
| CFSAN000212 | GCA_000748245.1  | SRR500494     | 2005                   | UAE       |
| CFSAN000211 | GCA_000698715.1  | SRR498373     | 2005                   | Thailand  |
| CFSAN000191 | GCA_000698635.1  | SRR498369     | 2005                   | Thailand  |
| CFSAN000228 | GCA_000748565.1  | SRR500493     | 2006                   | Taiwan    |
| CFSAN000189 | GCA_000439415.1  | SRR498276     | 2003                   | India     |
| CFSAN000963 | GCA_000749295.1  | SRR498436     | 2012                   | USA       |
| CFSAN001118 | GCA_000748065.1  | SRR1258443    | 2012                   | Indonesia |
| CFSAN000661 | GCA_000698515.1  | SRR498397     | 2012                   | USA       |
| CFSAN000968 | GCA_000698535.1  | SRR498442     | 2012                   | USA       |
| CFSAN001140 | GCA_000748085.1  | SRR1258440    | 2012                   | India     |
| CFSAN001112 | GCA_000748025.1  | SRR1258439    | 2012                   | India     |
| CFSAN000970 | GCA_000749415.1  | SRR498444     | 2012                   | USA       |
| CFSAN000669 | GCA_000749005.1  | SRR498399     | 2012                   | USA       |
| CFSAN000700 | GCA_000749045.1  | SRR498402     | 2012                   | USA       |
| CFSAN000752 | GCA_000749065.1  | SRR498403     | 2012                   | USA       |
| CFSAN000951 | GCA_000749145.1  | SRR498422     | 2012                   | USA       |
| CFSAN000753 | GCA_000749085.1  | SRR498404     | 2012                   | USA       |
| CFSAN001115 | GCA_000748045.1  | SRR1258442    | 2012                   | India     |
| CFSAN000954 | GCA_000748405.1  | SRR498425     | 2012                   | USA       |
| CFSAN000952 | GCA_000749165.1  | SRR498423     | 2012                   | USA       |
| CFSAN000960 | GCA_000748505.1  | SRR498433     | 2012                   | USA       |
| CFSAN000958 | GCA_000748465.1  | SRR498431     | 2012                   | USA       |
| CFSAN000961 | GCA_000748525.1  | SRR498434     | 2012                   | USA       |

**Supplemental Table S2: Resource usage for main steps in the data analysis.** The amount of central processing unit hours and the amount of memory used in Gigabytes (GB) for steps of the workflow is provided for assembly without polishing and assembly after two rounds of polishing.

| <b>Processor usage (CPU hours)</b> |                      |                                |                                 |
|------------------------------------|----------------------|--------------------------------|---------------------------------|
| <b>Step</b>                        | <b>No Nanopolish</b> | <b>One Round of Nanopolish</b> | <b>Two rounds of Nanopolish</b> |
| Unicycler                          | 8.8                  | 8.8                            | 8.8                             |
| Nanopolish                         | 0                    | 359.6                          | 729.7                           |
| Other                              | 4.5                  | 4.5                            | 4.5                             |
| <b>Maximum memory usage (GB)</b>   |                      |                                |                                 |
| <b>Step</b>                        | <b>No Nanopolish</b> | <b>One round of Nanopolish</b> | <b>Two Rounds of Nanopolish</b> |
| Unicycler                          | 5.4                  | 5.4                            | 5.4                             |
| Nanopolish                         | 0                    | 1                              | 1                               |
| Other                              | 5.2                  | 5.2                            | 5.2                             |
